# Supplementary material
Source: PubMed Central journal article supplement (PMC17614)
Supplement: pnas_97_25_13555__1.pdf [file pnas_97_25_13555__1.pdf]

**Table 1.** Unit cell parameters and data collection statistics for Glu1E191D, mutant -DIMBOAGlc, -DIMBOA, and -dhurrin complexes

|                                           | <i>Glu1E191D</i>                              | <i>Glu1E191D</i> in<br><i>complex with</i><br><i>DIMBOAglc</i> | <i>Glu1E191D</i> in<br><i>complex with</i><br><i>DIMBOA</i> | <i>Glu1E191D</i> in<br><i>complex with</i><br><i>dhurrin</i> |
|-------------------------------------------|-----------------------------------------------|----------------------------------------------------------------|-------------------------------------------------------------|--------------------------------------------------------------|
| Temperature (K)                           | 100                                           | 100                                                            | 100                                                         | 100                                                          |
| Space group                               | P2 <sub>1</sub> 2 <sub>1</sub> 2 <sub>1</sub> | P2 <sub>1</sub> 2 <sub>1</sub> 2 <sub>1</sub>                  | P2 <sub>1</sub> 2 <sub>1</sub> 2 <sub>1</sub>               | P2 <sub>1</sub> 2 <sub>1</sub> 2 <sub>1</sub>                |
| Cell <i>a</i> , <i>b</i> , <i>c</i> (Å)   | 92.1, 94.9, 117.5                             | 93.1, 95.3, 119.7                                              | 91.6, 95.3, 117.8                                           | 91.8, 95.0, 117.5                                            |
| Resol. range (Å)                          | 20 - 2.2                                      | 30 - 2.1                                                       | 30 - 2.1                                                    | 30 - 2.0                                                     |
| No. of observations                       | 159433                                        | 160343                                                         | 166961                                                      | 208572                                                       |
| No. of unique refl.                       | 51732                                         | 58752                                                          | 58526                                                       | 69098                                                        |
| Completeness of<br>data (%)               |                                               |                                                                |                                                             |                                                              |
| all data (outer shell)                    | 98.3 (96.4)                                   | 93.6 (90.8)                                                    | 96.7 (90.3)                                                 | 98.8 (97.1)                                                  |
| I/ (I) (outer shell)                      | 14.2 (2.4)                                    | 10.3 (1.8)                                                     | 7.7 (1.3)                                                   | 6.3 (1.3)                                                    |
| R <sub>sym</sub> <sup>a</sup> all data    | 0.043                                         | 0.068                                                          | 0.068                                                       | 0.084                                                        |
| R <sub>sym</sub> <sup>a</sup> outer shell | 0.141                                         | 0.263                                                          | 0.386                                                       | 0.440                                                        |

<sup>a</sup>R<sub>sym</sub> = (I- I)/ (I)
