# Supplementary material
Source: PubMed Central journal article supplement (PMC17614)
Supplement: pnas_97_25_13555__4.pdf [file pnas_97_25_13555__4.pdf]

**Table 2.** Refinement statistics for Glu1E191D, mutant -DIMBOAGlc, -DIMBOA, and -dhurrin complexes

|                                                | <i>Glu1E191D</i> | <i>Glu1E191D in complex with DIMBOAGlc</i> | <i>Glu1E191D in complex with DIMBOA</i> | <i>Glu1E191D in complex with dhurrin</i> |
|------------------------------------------------|------------------|--------------------------------------------|-----------------------------------------|------------------------------------------|
| Resolution range (Å)                           | 20- 2.2          | 30- 2.1                                    | 30- 2.1                                 | 30- 2.0                                  |
| sigma-cutoff                                   | 0.01             | 0.1                                        | 0.1                                     | 0.05                                     |
| R factor (%) (no. of refl.)                    | 20.73 (51715)    | 22.77 (58739)                              | 21.84 (58462)                           | 19.55 (69029)                            |
| R <sub>free</sub> factor (%) (5% of refl.)     | 24.38 (2592)     | 26.70 (2964)                               | 26.60 (2962)                            | 23.47 (3513)                             |
| No. of non-H protein atoms                     | 7934             | 7918                                       | 7918                                    | 7950                                     |
| No. of hetero-atoms                            | 18               | 52                                         | 30                                      | 44                                       |
| No. of solvent atoms                           | 386              | 326                                        | 437                                     | 606                                      |
| rms deviation from ideal geometry              |                  |                                            |                                         |                                          |
| Bond lengths (Å)                               | 0.007            | 0.006                                      | 0.007                                   | 0.006                                    |
| Bond angles (°)                                | 1.30             | 1.3                                        | 1.4                                     | 1.4                                      |
| dihedrals (°)                                  | 22.5             | 22.3                                       | 22.3                                    | 22.5                                     |
| impropers (°)                                  | 0.8              | 0.8                                        | 0.8                                     | 0.9                                      |
| Average B factor (Å <sup>2</sup> ) (all atoms) | 21.3             | 44.4                                       | 38.4                                    | 26.1                                     |
| Luzzati coor. error (Å)                        | 0.26             | 0.32                                       | 0.30                                    | 0.23                                     |
| Ramachandran outliers                          | 1                | 0                                          | 0                                       | 0                                        |
| Residues in most favorable regions (%)         | 87.7             | 86.3                                       | 86.0                                    | 86.9                                     |
