# Supplementary material
Source: PubMed Central journal article supplement (PMC17614)
Supplement: pnas_97_25_13555__5.pdf [file pnas_97_25_13555__5.pdf]

**Table 3.** Hydrogen bonding distances between the glycone moieties of dhurrin and DIMBOAGlc and the amino acid side chains in the glycone-binding site of Glu1 E191D

| Glucose position | Amino acid | Hydrogen bonding distance |            |
|------------------|------------|---------------------------|------------|
|                  |            | Dhurrin                   | DIMBOAGlc* |
| O6               | E464 OE2   | 2.6 Å                     | 2.6- 2.7 Å |
| O6               | W457 NE1   | 2.9 Å                     | 2.6- 3.2 Å |
| O4               | Q38 OE1    | 4.4 Å                     | 3.3 Å      |
| O4               | W465 NE1   | -                         | 4.2 Å      |
| O4               | W457 NE1   | 2.4 Å                     | -          |
| H2O              | Q38 OE1    | 2.7 Å                     | -          |
| H2O              | W465 NE1   | 2.9 Å                     | -          |
| O3               | H142 NE2   | 3.6 Å                     | 3.0 Å      |
| O3               | N190 ND2   | 3.8 Å                     | 3.2 Å      |
| O2               | E406 OE2   | 3.1 Å                     | 2.3- 3.1 Å |
| O2               | D191 OD2   | 2.6 Å                     | 2.7- 3.7 Å |
| C1               | E406 OE2   | 4.3 Å                     | 3.6-3.8 Å  |

\*The indicated range corresponds to the two possible conformers,  ${}^4C_1$  chair- and the  ${}^1S_3$  skew-boat.
