# Supplementary material
Source: PubMed Central journal article supplement (PMC17614)

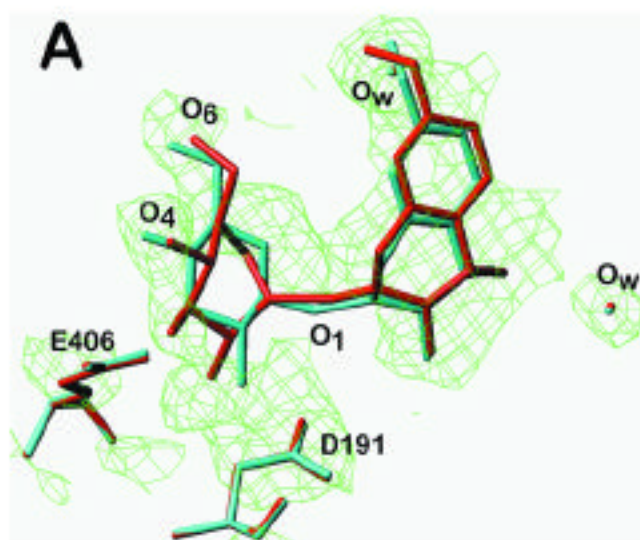

two conformers of DIMBOAGlc

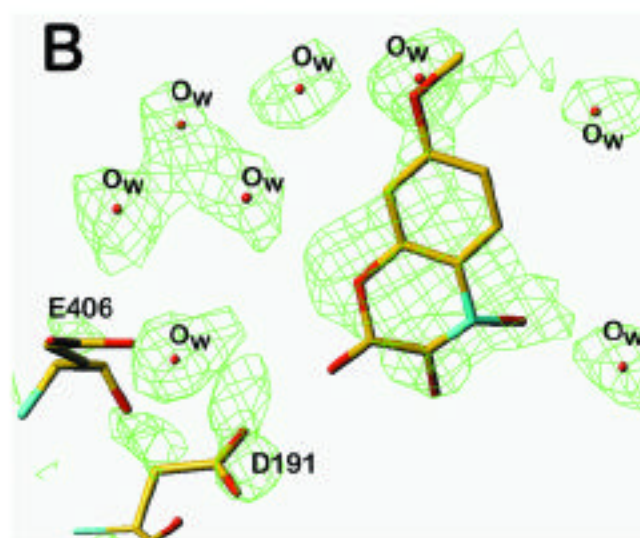

DIMBOA

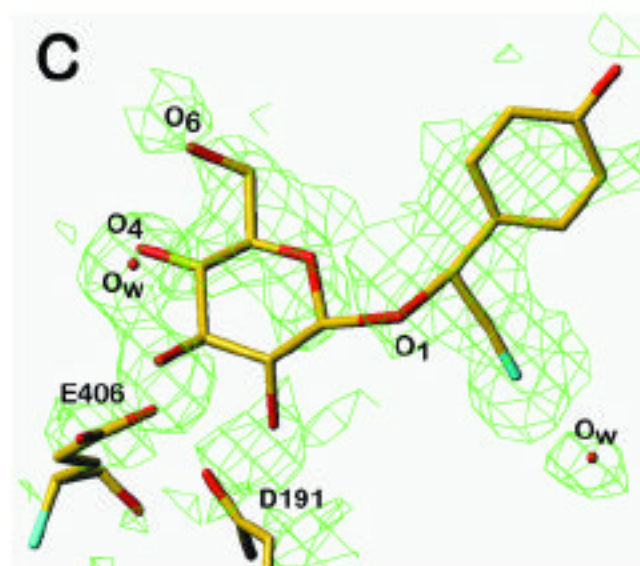

dhurrin

Supplement: pnas_97_25_13555__3.pdf [file pnas_97_25_13555__3.pdf]
